# Supplementary material for: Non-invasive in vivo imaging of UCP1 expression in live mice via near-infrared fluorescent protein iRFP720
Source: PubMed Central journal article supplement (PMC6857924; doi:10.1371/journal.pone.0225213), 2019-11-15
Supplement: pone.0225213.s001.pdf [file pone.0225213.s001.pdf]

**S1 Table****Primers for genomic PCR**

| Primer | Sequence                                |
|--------|-----------------------------------------|
| a      | ACGATGAGCCGATCCATATC                    |
| b      | GCAGGCCTAGTTTTGACTCG                    |
| c      | CCAAGTTGTTCTGGTTGCTCTCAATAA             |
| d      | AATGATCCGTACCGGGTTGATGGTATAG            |
| e      | TCCACAGGGGCCACCATGGCGGAAGGATCCGTCGCCAGG |
| f      | GCCCAATACACAAGCCCTAACACCATTAGATG        |
| g      | GCCTGAAGAGATTGCCCAAGTTCTCACAGAC         |
| h      | CACGCTCACCGGCTCCAGATTTATC               |
| i      | CAGGAGGCAGTCAAGAGCAGCTTC                |
| j      | AGTTCATCAAGCCCATCCTG                    |
| k      | GAAGTTTCTGTTGGCGAAGC                    |
